# Supplementary material
Source: Research Square preprint supplement (doi:10.21203/rs.3.rs-9728977/v1)
Supplement: Supplementary file 1 [file d66119a0aeac9ac0e81213d0.docx]

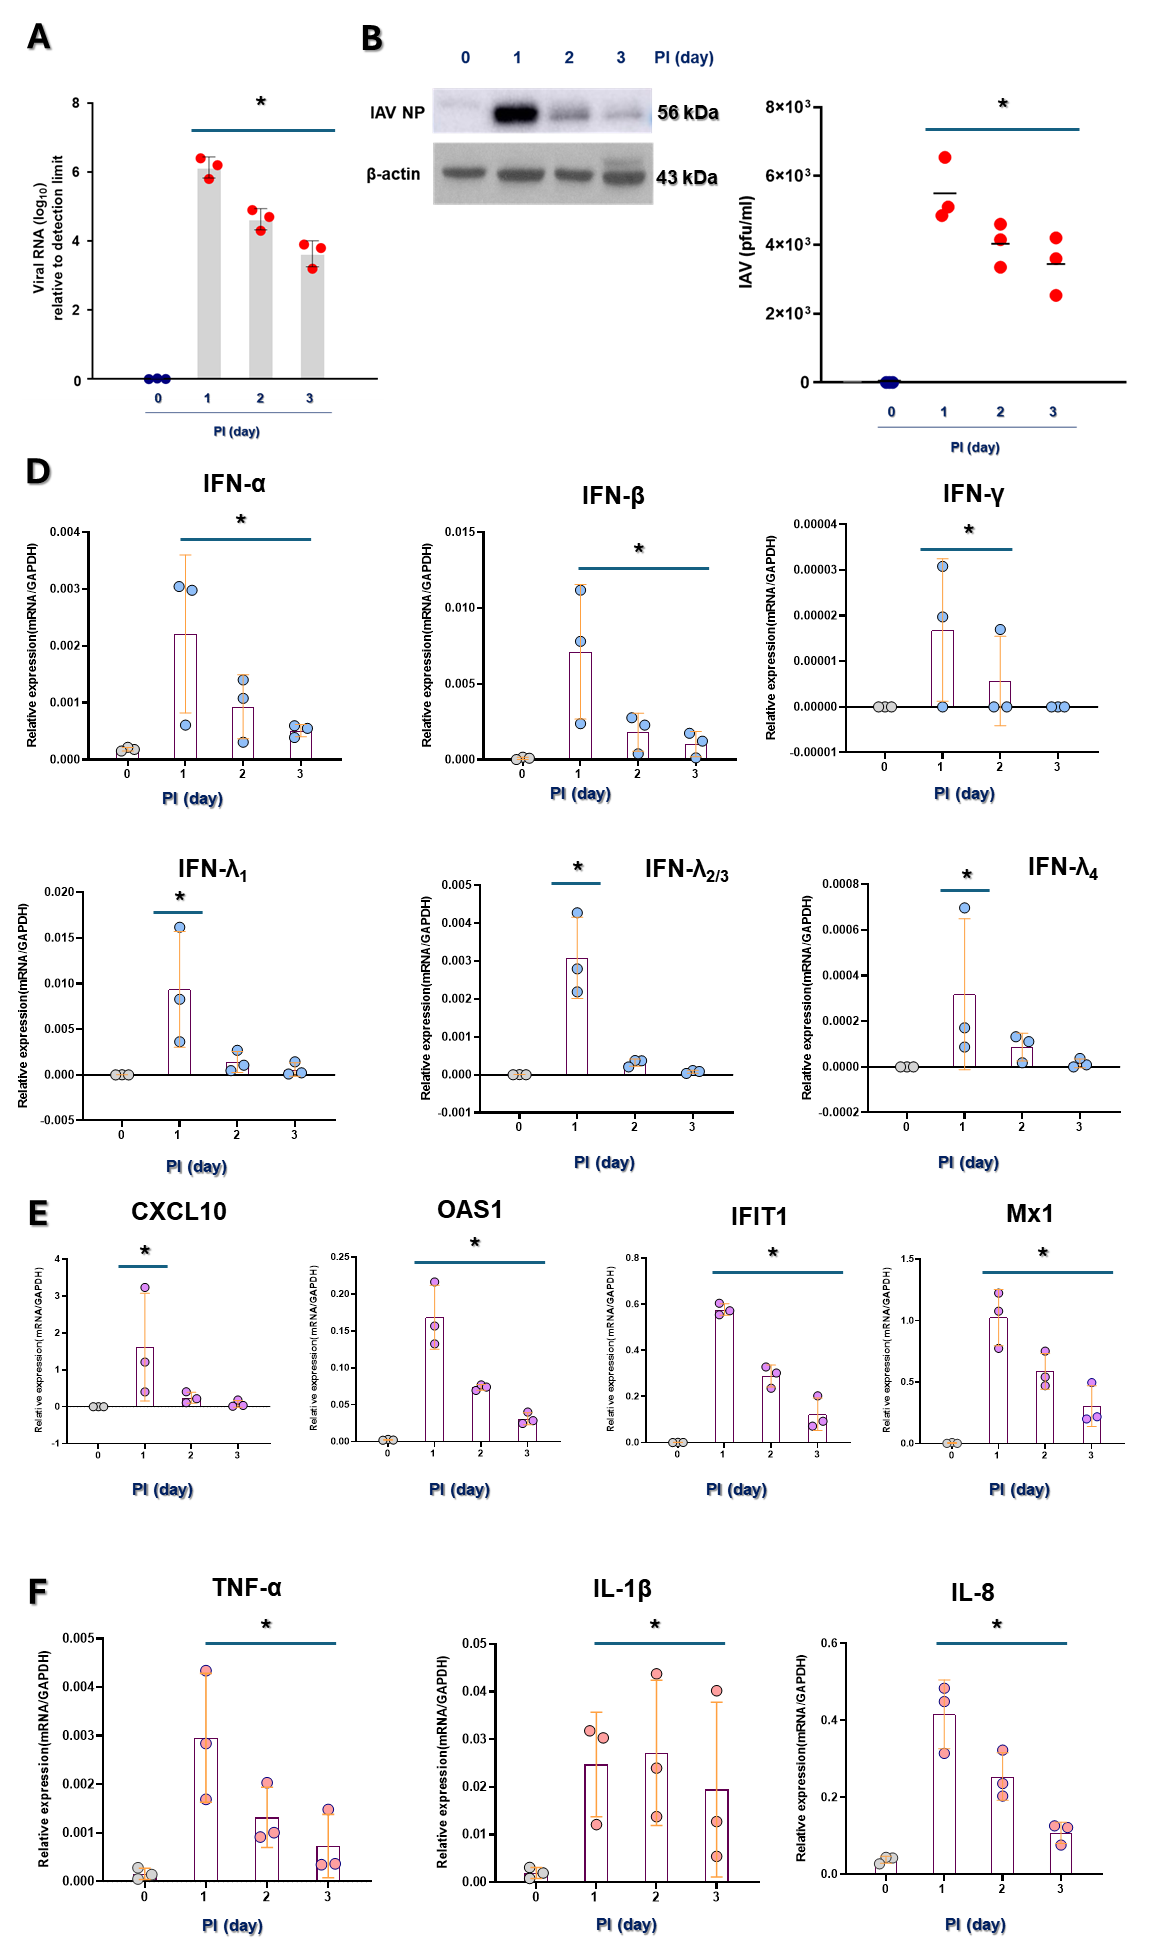
**Supplementary Fig. 1** **Innate immune responses in NEC organoids following IAV infection.**

P5 NEC organoids were inoculated with WSN/33 (H1N1) for 0 (no infection), 1, 2, and 3 days at an MOI of 1. (A)Real-time PCR showed that the IAV mRNA level was higher in NEC organoids from 1 day after infection, and the biggest difference in mRNA level was observed at 1 dpi. (B)Western blot analysis revealed that the level of IAV nucleoprotein (NP) was increased from 1 dpi in NEC organoid after IAV infection. (C)A plaque assay also showed that the viral titer in the supernatant of IAV-infected NEC organoid was significantly higher from 1 dpi. (D) Real-time PCR showed that **e** the IFN mRNA levels, (E) representative IFN-stimulated genes, and (F) inflammatory cytokines were increased in NEC organoids from 1 day after infection excepting IFN-Υ, and the biggest difference in mRNA level was observed at 1 dpi. Results are presented here as the mean ± standard deviation (SD) from 3 independent experiments (*p<0.05 comparing the levels with no infection). (PI: post of infection)
